# Supplementary material
Source: Springer Nature journal article supplement (https://www.springermedizin.de/resource/supplementary/12936_2012_2592_MOESM5_ESM.pdf/9544838)

## Entomological inoculation rate

2

20

50

Ln(ICER(\$ per episode averted))

0

40

60

ITN coverage (%)

80

Year of MSAT intervention

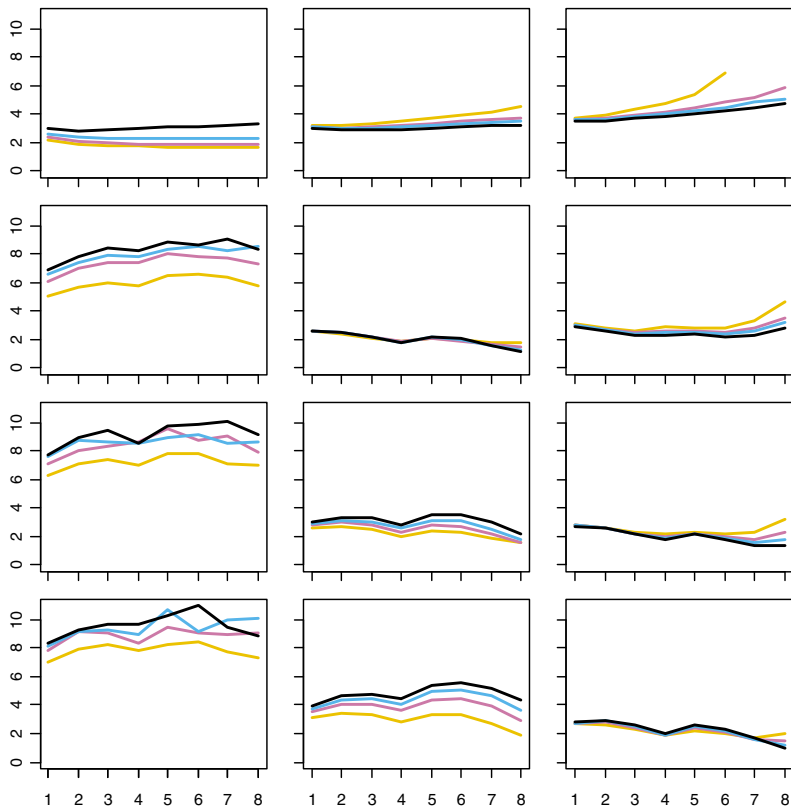

Supplement: MOESM5 [file 9544838]
